# Supplementary material for: The Impact of Different Cultivation Systems on the Content of Selected Secondary Metabolites and Antioxidant Activity of Carlina acaulis Plant Material
Source: PubMed Central journal article supplement (PMC6983060; doi:10.3390/molecules25010146), 2019-12-30
Supplement: molecules-25-00146-s001.pdf [file molecules-25-00146-s001.pdf]

# Supplementary material

## The impact of different cultivation systems on the content of selected secondary metabolites and antioxidant activity of *Carlina acaulis* plant material

Maciej Strzemiński <sup>1,\*</sup>, Sławomir Dresler <sup>2</sup>, Ireneusz Sowa <sup>1</sup>, Anna Czubańska <sup>3</sup>,  
Monika Agacka-Mołdoch <sup>3</sup>, Bartosz J. Płachno <sup>4</sup>, Sebastian Granica <sup>5</sup>, Marcin Feldo <sup>6</sup> and  
Magdalena Wójciak <sup>1,\*</sup>

<sup>1</sup> Department of Analytical Chemistry, Medical University of Lublin, Chodźki 4a, 20-093 Lublin, Poland; i.sowa@umlub.pl (I.S.); kosiorma@wp.pl (M.W.)

<sup>2</sup> Department of Plant Physiology and Biophysics, Maria Curie-Skłodowska University, Akademicka 19, 20-033 Lublin, Poland; slawomir.dresler@poczta.umcs.lublin.pl (S.D.)

<sup>3</sup> Department of Plant Breeding and Biotechnology, Institute of Soil Science and Plant Cultivation, State Research Institute, Czartoryskich 8 St., 24-100 Puławy, Poland; annacz@iung.pulawy.pl (A.CZ.); magacka@iung.pulawy.pl (M.AM.)

<sup>4</sup> Department of Plant Cytology and Embryology, Institute of Botany, Faculty of Biology, Jagiellonian University, Gronostajowa 9 St. 30-387 Cracow, Poland; bartosz.plachno@uj.edu.pl (B.P.)

<sup>5</sup> Department of Pharmacognosy and Molecular Basis of Phytotherapy, Faculty of Pharmacy, Medical University of Warsaw, Banacha 1 St., 02-097 Warsaw, Poland; sgranica@gmail.com (S.G.)

<sup>6</sup> Department of Vascular Surgery, Medical University of Lublin, Staszica 11 St. 20-081 Lublin, Poland; marcin.feldo@umlub.pl (M.F.)

\* Correspondence: maciej.strzemski@poczta.onet.pl (M.S.); kosiorma@wp.pl (M.W.)

**Table S1.** Organogenesis on explants originated from *Carlina acaulis* L. plants.

| Organ  | Medium | Plant morphology | Percentage of explants regenerating into: |        |
|--------|--------|------------------|-------------------------------------------|--------|
|        |        |                  | Roots                                     | Shoots |
| Roots  | A      | glabrous         | 1.06                                      | 6.38   |
|        |        | tomentose        | 0                                         | 0.59   |
|        | B      | glabrous         | 0                                         | 7.32   |
|        |        | tomentose        | 3.70                                      | 10.37  |
|        | C      | glabrous         | 0                                         | 0      |
|        |        | tomentose        | 0                                         | 0.67   |
|        | D      | glabrous         | 0                                         | 0      |
|        |        | tomentose        | 0                                         | 0      |
|        | E      | glabrous         | 0                                         | 0      |
|        |        | tomentose        | 0                                         | 0      |
| Leaves | A      | glabrous         | 3.75                                      | 0      |
|        |        | tomentose        | 0.88                                      | 0      |
|        | B      | glabrous         | 0                                         | 0      |
|        |        | tomentose        | 0                                         | 0      |
|        | C      | glabrous         | 0                                         | 0      |
|        |        | tomentose        | 0                                         | 0      |
|        | D      | glabrous         | 0                                         | 0      |
|        |        | tomentose        | 0                                         | 0      |
|        | E      | glabrous         | 0                                         | 0      |
|        |        | tomentose        | 0                                         | 0      |

**Table 2.** Physical characteristics of callus tissue formed on *Carlina acaulis* L. explants.

| Medium | Plant morphology | Characteristics of callus formed on explants: |                                                    |
|--------|------------------|-----------------------------------------------|----------------------------------------------------|
|        |                  | Leaves                                        | Roots                                              |
| A      | glabrous         | compact, hard, grainy, light green            | compact, hard, grainy, cream / beige / light green |
|        | tomentose        | compact, hard, grainy, light green / cream    | compact, hard, grainy, cream / light green         |
| B      | glabrous         | friable, grainy, moist, cream                 | friable, grainy, moist, cream / beige              |
|        | tomentose        | friable, grainy, moist, cream                 | friable, grainy, moist, cream / beige              |
| C      | glabrous         | hard, grainy, moist, cream                    | hard, grainy, moist, cream / beige                 |
|        | tomentose        | hard, grainy, moist, cream                    | hard, grainy, moist, cream / light green           |
| D      | glabrous         | hard, grainy, moist, cream                    | soft, grainy, moist, cream / beige                 |
|        | tomentose        | hard, grainy, moist, cream                    | soft, grainy, moist, cream / light green           |
| E      | glabrous         | soft, grainy, moist, cream / light green      | soft, grainy, moist, cream / light green           |
|        | tomentose        | soft, grainy, moist, cream                    | soft, grainy, moist, cream / beige                 |

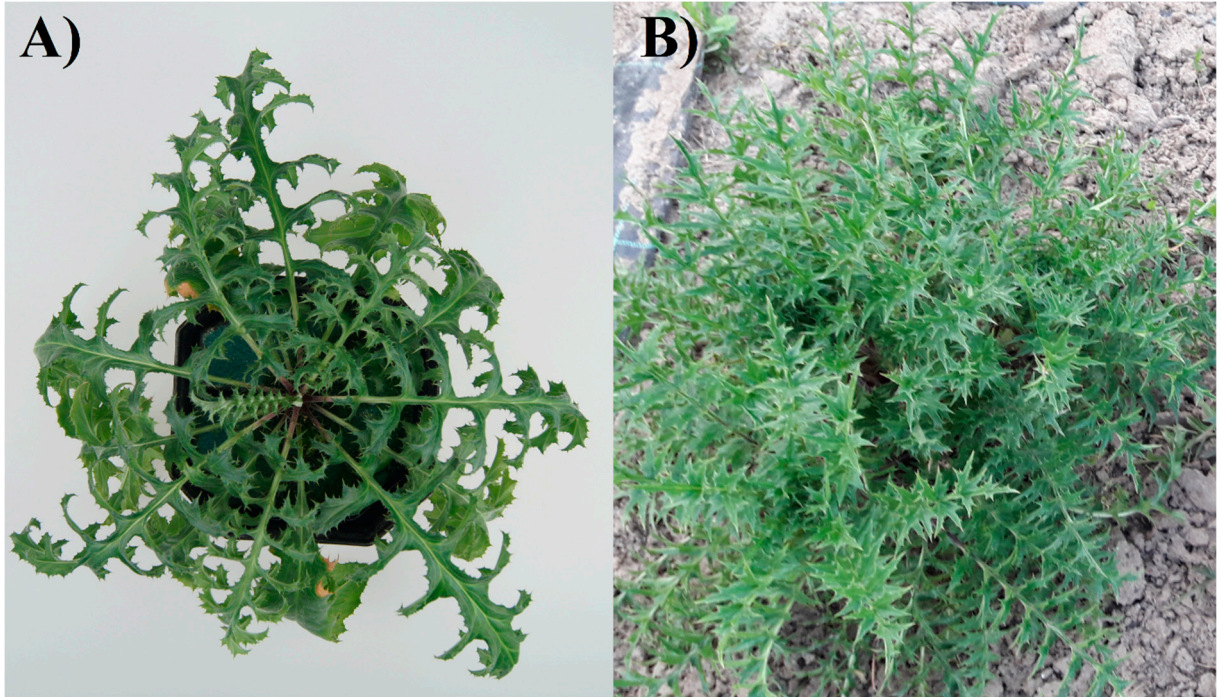

**Figure S1.** Photographs of examples of *Carlina acaulis* L. plants obtained in hydroponic cultures (A) and soil cultivation (B).

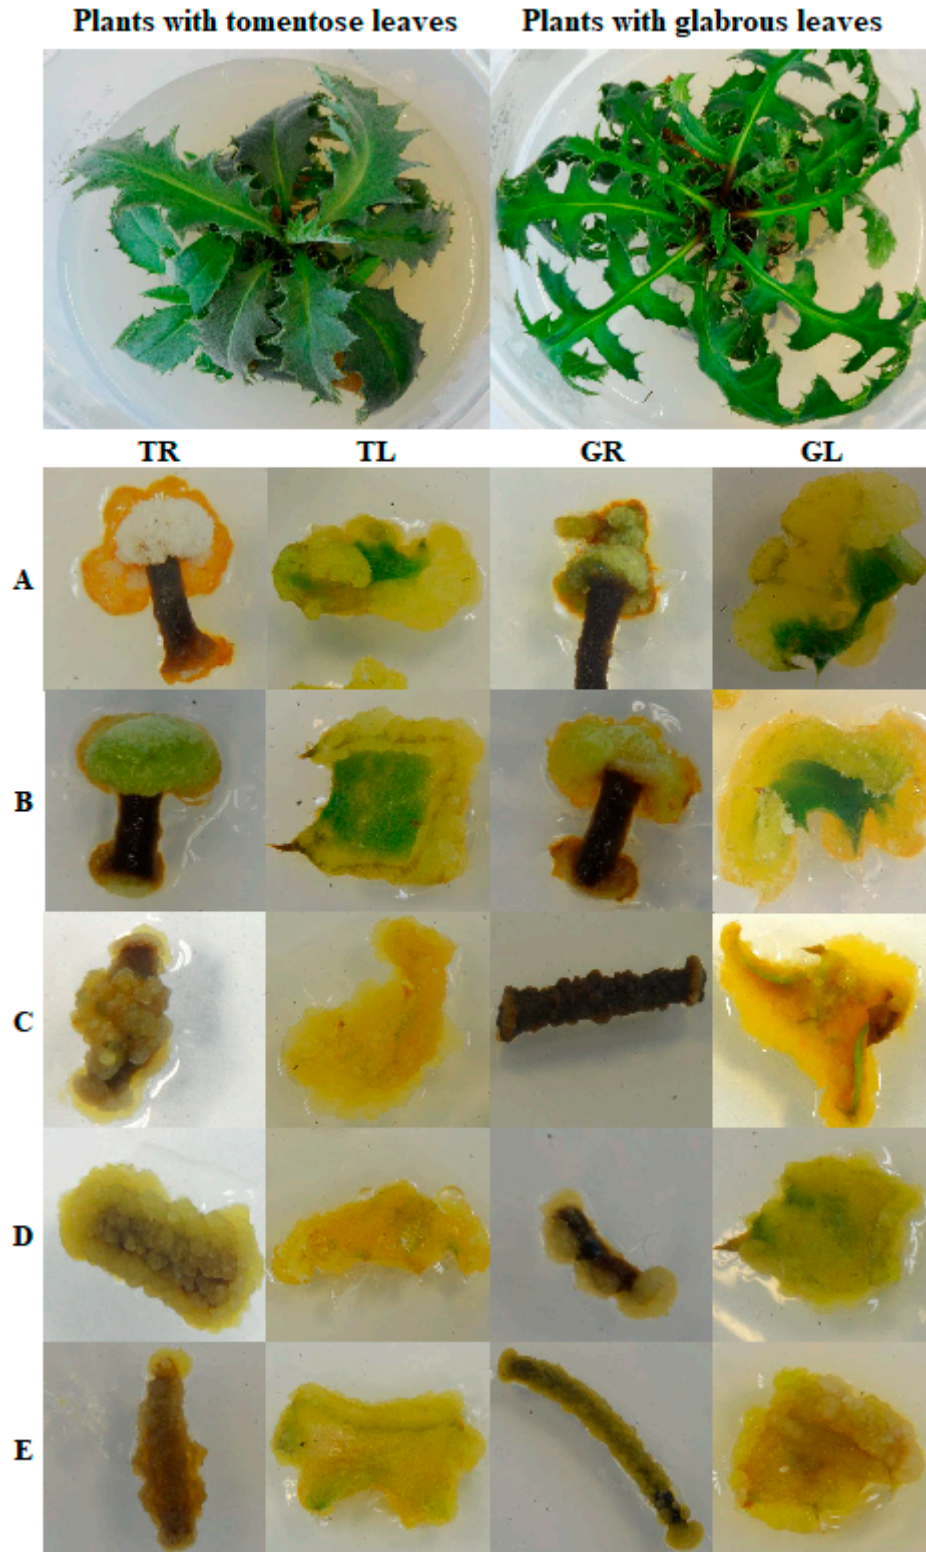

**Figure S2.** Photographs of sample callus tissues obtained from the roots and leaves of *Carlina acaulis* L. plants, using A-E media.
